# Supplementary material for: Use of Multimodal Technology to Identify Digital Correlates of Violence Among Inpatients With Serious Mental Illness: A Pilot Study
Source: Atypon-hosted journal article supplement (doi:10.1176/appi.ps.201700077), 2017-07-03

---

**Supplemental Table 1. EMA Items**

---

**Affect**

How ANGRY do you feel?

How SAD do you feel?

How BORED do you feel?

How RESTLESS do you feel?

---

**Environmental Conditions**

Is it CROWDED right now?

Is it NOISY right now?

---

**Delusions**

Do you think someone is SPYING or trying to HURT you?

Do you think someone is INSERTING IDEAS into your head?

Do you think you have SPECIAL POWERS or GIFTS that other people do not?

---

**Substance Cravings**

How strongly do you feel like using DRUGS?

How strongly do you feel like using ALCOHOL?

How strongly do you feel like SMOKING?

---

**Withdrawal Symptoms**

Do you have an UPSET STOMACH?

Are you having any HOT flashes or COLD flashes?

Do your BONES or MUSCLES hurt?

---

**Suicidal Ideation**

Are you thinking of ENDING YOUR LIFE?

---

**Violent Ideation and Behavior**

Are you thinking of HARMING someone?

Since the last time we asked, have you THREATENED anyone?

Since the last time we asked, have you been PHYSICALLY AGGRESSIVE towards anyone?

Since the last time we asked, have you DAMAGED anything, like furniture, or clothing?

---

Supplemental Table 2. Results of multivariate non-linear mixed models of violent ideation and behaviors including all predictors significant in the bivariate models.

|                                  | <b>Ideation</b>         |                    | <b>Behavior</b>         |                     |                    |            |
|----------------------------------|-------------------------|--------------------|-------------------------|---------------------|--------------------|------------|
|                                  | Thinking of Harming     |                    | Damaged Property        |                     | Threatened Someone |            |
|                                  | OR                      | 95% CI             | OR                      | 95% CI              | OR                 | 95% CI     |
| <b>Passively Sensed Features</b> |                         |                    |                         |                     |                    |            |
| <b>Smartphone detection</b>      |                         |                    |                         |                     |                    |            |
| Physical activity (min)          | 1.65                    | .77 - 3.53         |                         |                     |                    |            |
| Physical activity (variability)  | 1.07                    | .49 - 2.32         |                         |                     |                    |            |
| <b>Self-Report</b>               |                         |                    |                         |                     |                    |            |
| Suicidal ideation                | <b>3.39<sup>a</sup></b> | <b>1.19 - 9.70</b> | 2.22                    | .46 - 10.73         |                    |            |
| Being spied upon                 | 1.43                    | .52 - 3.98         | 2.91                    | .52 - 16.16         |                    |            |
| Thought insertion                | <b>3.10<sup>a</sup></b> | <b>1.02 - 9.41</b> | 1.86                    | .24 - 14.44         |                    |            |
| Special powers                   | .41                     | .13 - 1.27         |                         |                     |                    |            |
| Cravings                         |                         |                    |                         |                     |                    |            |
| Drugs                            | 1.04                    | .34 - 3.25         | 1.72                    | .25 - 11.82         |                    |            |
| Alcohol                          | 1.49                    | .47 - 4.73         | 1.04                    | .14 - 7.99          | 1.51               | .45 - 5.07 |
| Cigarettes                       | 2.44                    | .70 - 8.44         | 1.95                    | .31 - 12.39         | 1.38               | .40 - 4.85 |
| Withdrawal symptoms              |                         |                    |                         |                     |                    |            |
| Hot/Cold flashes                 |                         |                    | <b>4.63<sup>a</sup></b> | <b>1.16 - 18.53</b> | 2.49               | .92 - 6.73 |
| Affective state                  |                         |                    |                         |                     |                    |            |
| Angry                            | 1.25                    | .54 - 2.87         | 1.79                    | .38 - 8.54          | 2.90               | .98 - 8.55 |
| Sad                              | 1.56                    | .58 - 4.23         |                         |                     | 2.14               | .62 - 7.42 |
| Restless                         | <b>3.19<sup>a</sup></b> | <b>1.24 - 8.18</b> | 1.74                    | .32 - 9.60          |                    |            |
| Ward conditions                  |                         |                    |                         |                     |                    |            |
| Noisy                            | <b>2.46<sup>a</sup></b> | <b>1.11 - 5.47</b> |                         |                     |                    |            |

<sup>a</sup> p<.05

**Figure 1A. Bluetooth beacons installed on the inpatient unit.**

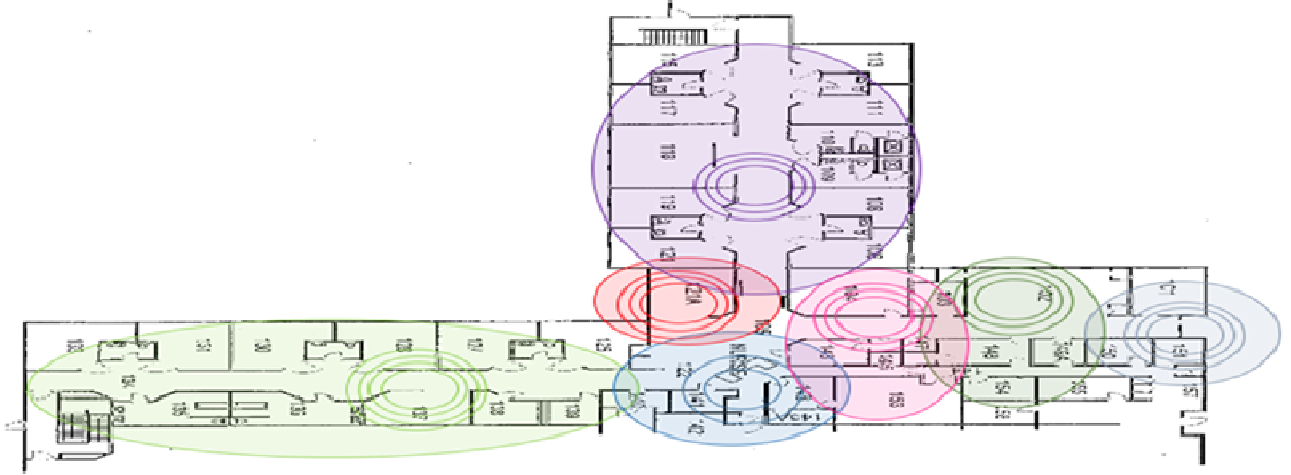

**Figure 1B. Smartphones receiving beacon signals and recording participants' location.**

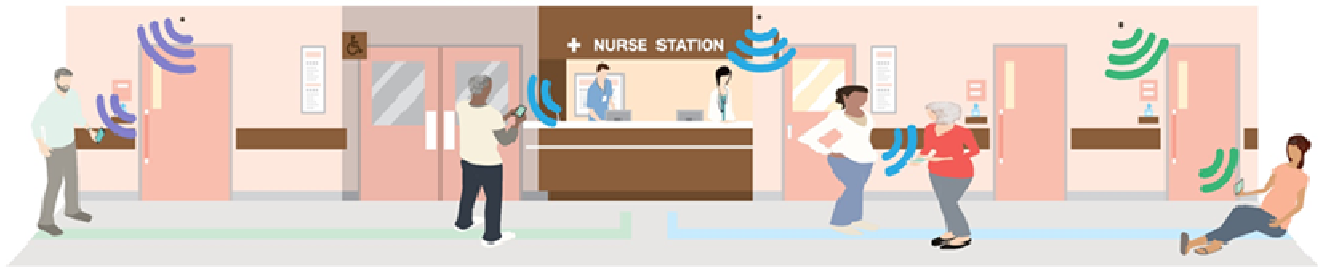

Supplement: appi.ps.201700077.ds001.pdf [file appi.ps.201700077.ds001.pdf]
